# Supplementary material for: Is obesity more likely among children sharing a household with an older child with obesity? Cross-sectional study of linked National Child Measurement Programme data and electronic health records
Source: PubMed Central journal article supplement (PMC11015308; doi:10.1136/bmjpo-2024-002533), 2024-04-10
Supplement: bmjpo-2024-002533supp001.pdf [file bmjpo-2024-002533supp001.pdf]

## Is obesity more likely among children sharing a household with an older child with obesity? Cross-sectional study of linked National Child Measurement Programme data and electronic health records

Nicola Firman,<sup>1</sup> Marta Wilk,<sup>1</sup> Milena Marszalek,<sup>1</sup> Lucy Griffiths,<sup>2</sup> Gill Harper,<sup>1</sup> Carol Dezateux<sup>1</sup>

<sup>1</sup> Centre for Primary Care, Wolfson Institute of Population Health, Faculty of Medicine and Dentistry, Queen Mary University of London, Yvonne Carter Building, 58 Turner Street, London, E1 2AB

<sup>2</sup> Swansea University Medical School, Faculty of Medicine, Health & Life Sciences

### Supplementary material

Figure S1 – Relationship between address and General Practice (GP) registration dates and Residential Anonymised Linkage Fields (RALFs) at the time of National Child Measurement Programme (NCMP)

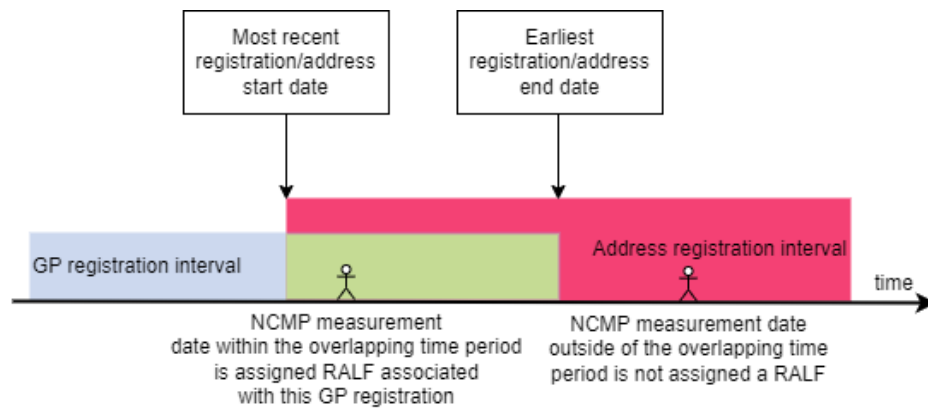

Figure S2 – Identifying National Child Measurement Programme (NCMP) participants' valid General Practice (GP)-recorded Residential Anonymised Linkage Fields (RALFs)

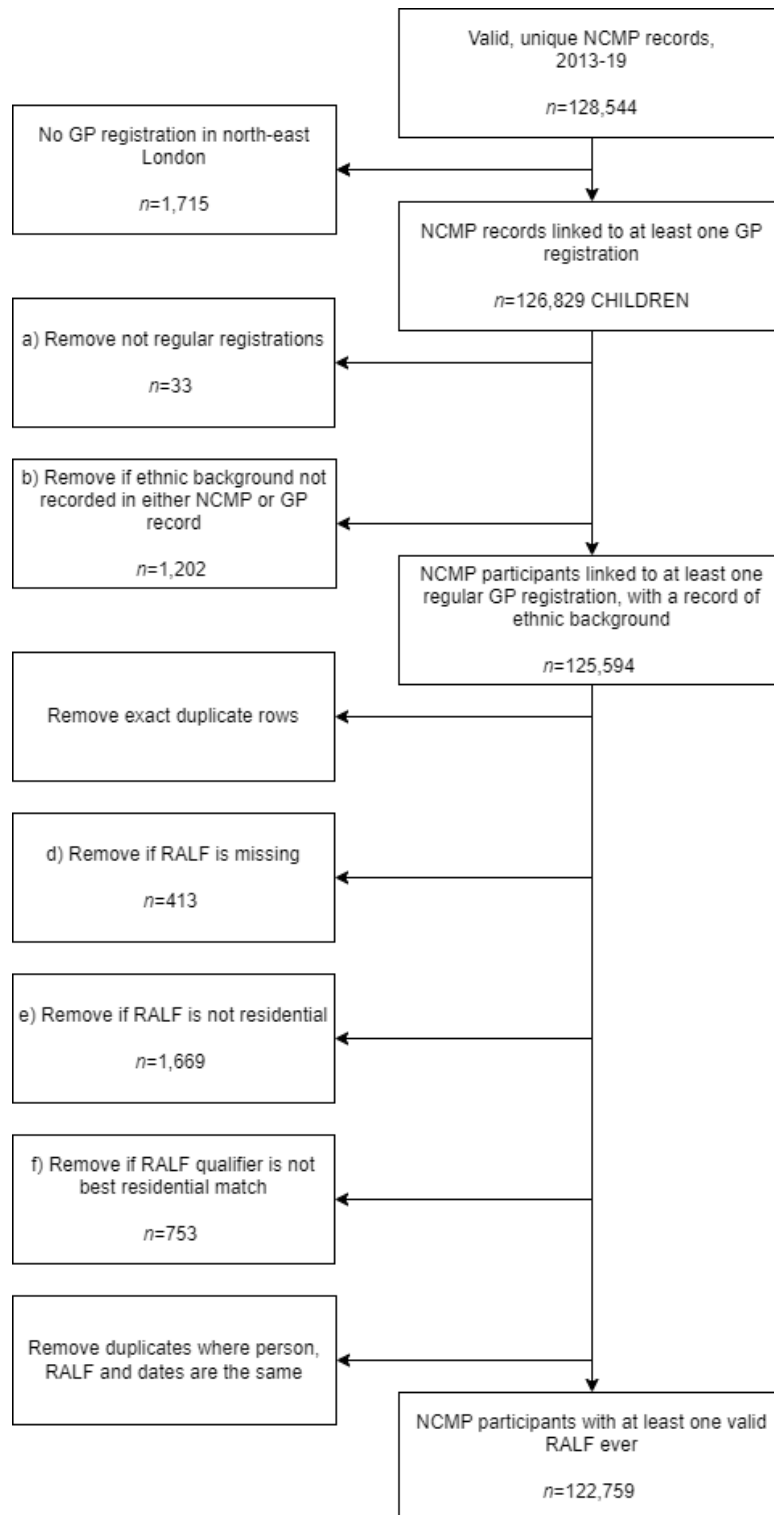

Figure S3 – Identifying National Child Measurement Programme (NCMP) participants sharing a household using Residential Anonymised Linkage Fields (RALFs)

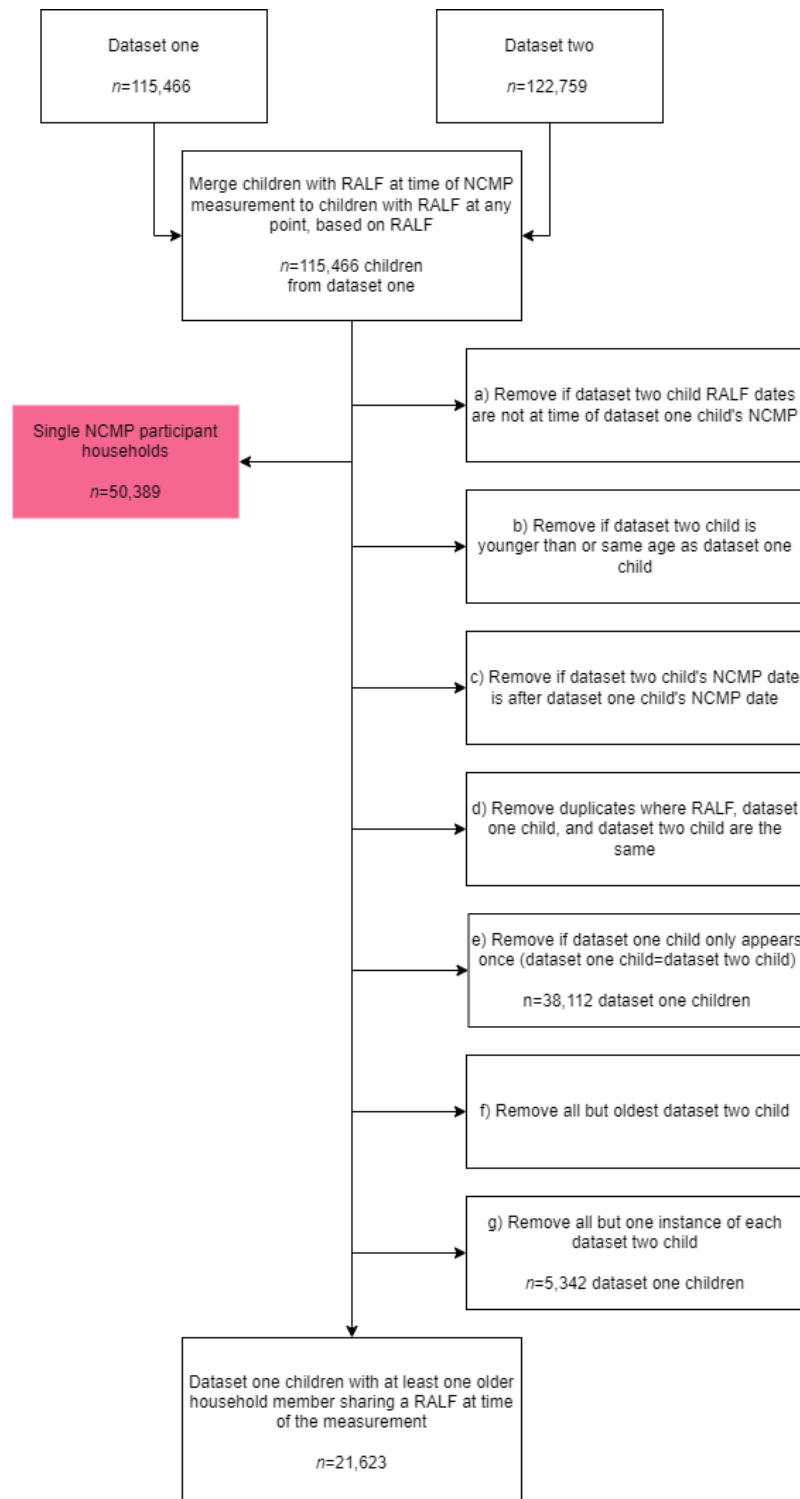

Index children were joined with children in dataset two using Stata's many to many `joinby` function, combining all pairwise combinations on common RALFs. Where an older child matched to multiple index children, only one random pair was retained ( $n=5,342$ ).

Figure S4 – Identifying all other household members at the time of the index child's NCMP measurement

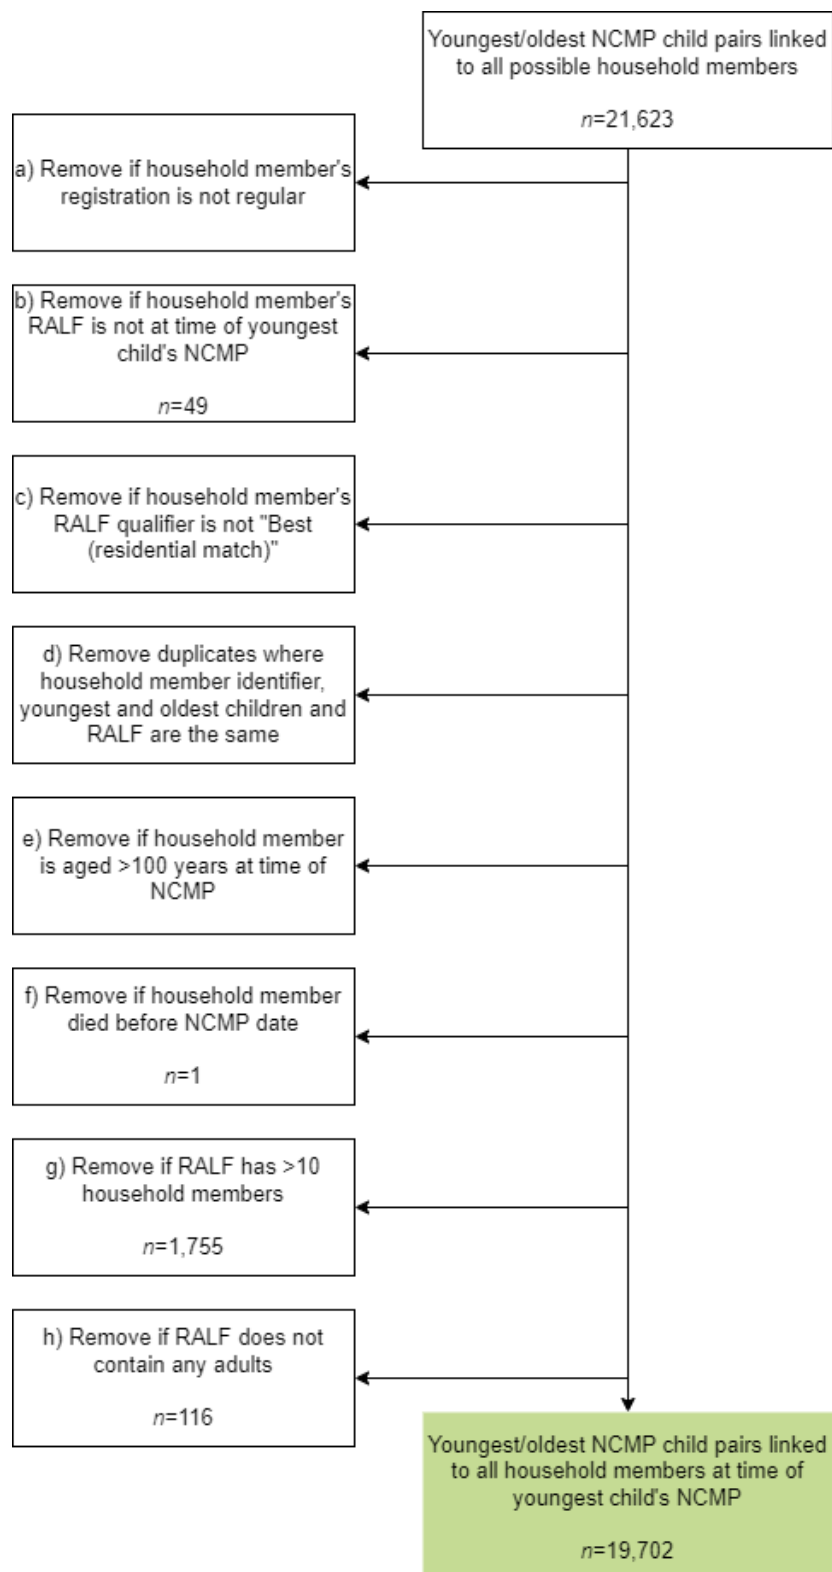

For each household member, age at the time of the youngest child's NCMP measurement was calculated.

Table S1 – Sample characteristics of oldest National Child Measurement Programme participants in the household

The distribution by sex, ethnic background and weight status was broadly representative of NCMP participants in the four local authorities as a whole.

|                                      | All (n=19,702) |      |                     | Reception (n=6,506) |       |                     | Year 6 (n=13,196) |       |                     |
|--------------------------------------|----------------|------|---------------------|---------------------|-------|---------------------|-------------------|-------|---------------------|
|                                      | n              | %    | 95% CI <sup>1</sup> | n                   | %     | 95% CI <sup>1</sup> | n                 | %     | 95% CI <sup>1</sup> |
| <b>Sex</b>                           |                |      |                     |                     |       |                     |                   |       |                     |
| Male                                 | 9975           | 50.6 | 49.9,51.3           | 3268                | 50.1  | 48.9,51.3           | 6707              | 50.9  | 50.0,51.7           |
| Female                               | 9727           | 49.4 | 48.7,50.1           | 3238                | 49.9  | 48.7,51.1           | 6489              | 49.1  | 48.3,50.0           |
| <b>School year<sup>2</sup></b>       |                |      |                     |                     |       |                     |                   |       |                     |
| Reception                            | 6506           | 33.0 | 32.3,33.6           | 6506                | 100.0 |                     |                   |       |                     |
| Year 6                               | 13196          | 67.0 | 66.4,67.7           |                     |       |                     | 13196             | 100.0 |                     |
| <b>Academic year<sup>3</sup></b>     |                |      |                     |                     |       |                     |                   |       |                     |
| 2013/14                              | 3387           | 17.2 | 16.7,17.7           | 1418                | 21.8  | 20.8,22.9           | 1969              | 14.9  | 14.3,15.5           |
| 2014/15                              | 3820           | 19.4 | 18.9,20.0           | 1412                | 21.7  | 20.7,22.7           | 2408              | 18.3  | 17.6,19.0           |
| 2015/16                              | 5888           | 29.9 | 29.3,30.5           | 2075                | 31.9  | 30.8,33.0           | 3813              | 28.9  | 28.1,29.7           |
| 2016/17                              | 1435           | 21.0 | 20.4,21.6           | 1251                | 19.2  | 18.3,20.2           | 2884              | 21.9  | 21.2,22.6           |
| 2017/18 & 2018/19                    | 2472           | 12.5 | 12.1,13.0           | 350                 | 5.3   | 4.9,6.0             | 2122              | 16.0  | 15.5,16.7           |
| <b>Local authority<sup>4</sup></b>   |                |      |                     |                     |       |                     |                   |       |                     |
| City & Hackney                       | 5041           | 25.6 | 25.0,26.2           | 1848                | 28.4  | 27.4,29.5           | 3193              | 24.2  | 23.5,24.9           |
| Newham                               | 3460           | 17.5 | 17.0,18.1           | 864                 | 13.3  | 12.5,14.1           | 2596              | 19.6  | 19.0,20.3           |
| Tower Hamlets                        | 6458           | 32.8 | 32.1,33.5           | 2006                | 30.8  | 29.6,31.9           | 4452              | 33.8  | 33.0,34.6           |
| Waltham Forest                       | 4743           | 24.1 | 23.5,24.7           | 1788                | 27.5  | 26.5,28.6           | 2955              | 22.4  | 21.7,23.1           |
| <b>Ethnic background<sup>5</sup></b> |                |      |                     |                     |       |                     |                   |       |                     |
| White                                | 4503           | 22.9 | 22.3,23.4           | 1873                | 28.8  | 27.7,29.9           | 2630              | 19.9  | 19.3,20.6           |
| Mixed and Other                      | 4118           | 20.9 | 20.3,21.5           | 1361                | 20.9  | 20.0,21.9           | 2757              | 20.9  | 20.2,21.6           |
| South Asian                          | 6857           | 34.8 | 34.1,35.5           | 1917                | 29.5  | 28.4,30.6           | 4940              | 37.4  | 36.6,38.3           |
| Black                                | 4224           | 21.4 | 20.9,22.0           | 1355                | 20.8  | 19.8,21.8           | 2869              | 21.7  | 21.1,22.5           |
| <b>Weight status<sup>6</sup></b>     |                |      |                     |                     |       |                     |                   |       |                     |
| Underweight                          | 280            | 1.4  | 1.3,1.6             | 97                  | 1.5   | 1.2,1.8             | 183               | 1.4   | 1.2,1.6             |
| Healthy weight                       | 13938          | 70.7 | 70.1,71.4           | 5299                | 81.4  | 80.5,82.4           | 8639              | 65.5  | 64.7,66.3           |
| Overweight                           | 2930           | 14.9 | 14.4,15.4           | 679                 | 10.4  | 9.7,11.2            | 2251              | 17.0  | 16.4,17.7           |
| Obese                                | 2554           | 13.0 | 12.5,13.4           | 431                 | 6.7   | 6.1,7.3             | 2123              | 16.1  | 15.5,16.7           |

<sup>1</sup> Confidence interval. <sup>2</sup> School year of participation in the National Child Measurement Programme (NCMP), Reception participants are aged 4-5 years and Year 6 participants are aged 10-11 years. <sup>3</sup> Academic year of participation in the NCMP. Academic years run from September to July. The 2017/18 and 2018/19 academic years were combined to minimise risk of disclosure of individuals. <sup>4</sup> Local authority of school where child participated in the NCMP. <sup>5</sup> As recorded in the NCMP and, where missing, supplemented with ethnic background as recorded in the child's primary care electronic health record. <sup>6</sup> NCMP-recorded body mass index (BMI) after application of ethnic-specific BMI adjustments, categorised according to UK1990 clinical reference standard: "underweight" (BMI < 2nd centile), "healthy weight" (≥ 2nd to < 91st centile), "overweight" (≥ 91st to < 98th centile), or "obese" (≥ 98th centile).

Table S2 – Weight status distribution of index children participating in the National Child Measurement Programme, using UK1990 clinical and International Obesity Task Force cut-offs

|                                                  | All (n=19,702) |      |                     | Reception (n=13,699) |      |                     | Year 6 (n=6,003) |      |                     |
|--------------------------------------------------|----------------|------|---------------------|----------------------|------|---------------------|------------------|------|---------------------|
|                                                  | n              | %    | 95% CI <sup>1</sup> | n                    | %    | 95% CI <sup>1</sup> | n                | %    | 95% CI <sup>1</sup> |
| <b>UK1990 clinical reference standard</b>        |                |      |                     |                      |      |                     |                  |      |                     |
| Underweight                                      | 270            | 1.4  | 1.2,1.5             | 194                  | 1.4  | 1.2,1.6             | 76               | 1.3  | 1.0,1.6             |
| Healthy weight                                   | 15005          | 76.2 | 75.6,76.8           | 11025                | 80.5 | 79.9,81.2           | 3980             | 66.3 | 65.1,67.5           |
| Overweight                                       | 2372           | 12.0 | 11.5,12.4           | 1399                 | 10.2 | 9.7,10.7            | 973              | 16.1 | 15.2,17.0           |
| Obese                                            | 2055           | 10.4 | 10.0,10.9           | 1081                 | 7.9  | 7.4,8.3             | 974              | 16.3 | 15.4,17.3           |
| <b>International Obesity Task Force cut-offs</b> |                |      |                     |                      |      |                     |                  |      |                     |
| Underweight                                      | 1409           | 7.1  | 6.8,7.5             | 1037                 | 7.6  | 7.1,8.0             | 372              | 6.2  | 5.6,6.8             |
| Healthy weight                                   | 13339          | 67.7 | 67.0,68.4           | 9682                 | 70.7 | 69.9,71.4           | 3657             | 60.9 | 59.7,62.1           |
| Overweight                                       | 3485           | 17.7 | 17.2,18.2           | 2054                 | 15.0 | 14.4,15.6           | 1431             | 23.8 | 22.8,24.9           |
| Obese                                            | 1469           | 7.5  | 7.1,7.8             | 926                  | 6.7  | 6.4,7.2             | 543              | 9.1  | 8.3,9.8             |

<sup>1</sup> Confidence interval.Table S3 – Household characteristics of children living in households with two National Child Measurement Programme participants, by index child's weight status<sup>1</sup>

|                                            | Youngest child (n=19 702)               |      |           |                      |      |           |                 |      |           |
|--------------------------------------------|-----------------------------------------|------|-----------|----------------------|------|-----------|-----------------|------|-----------|
|                                            | Underweight & Healthy weight (n=15 275) |      |           | Overweight (n=2 372) |      |           | Obese (n=2 055) |      |           |
| <b>Number of children in the household</b> |                                         |      |           |                      |      |           |                 |      |           |
| 2                                          | 4 992                                   | 32.7 | 31.9,33.4 | 789                  | 33.3 | 31.6,35.4 | 668             | 32.5 | 30.5,34.5 |
| 3                                          | 5 596                                   | 36.6 | 35.8,37.4 | 899                  | 37.9 | 35.9,39.8 | 733             | 35.7 | 33.7,37.8 |
| 4 or more                                  | 4 687                                   | 30.7 | 30.0,31.5 | 684                  | 28.8 | 26.9,30.6 | 654             | 31.8 | 29.8,33.8 |
| <b>Household composition</b>               |                                         |      |           |                      |      |           |                 |      |           |
| Adults with children                       | 11 593                                  | 75.9 | 75.2,76.6 | 1 797                | 75.8 | 74.0,77.5 | 1 586           | 77.2 | 75.3,78.9 |
| Single adult with children                 | 2 282                                   | 14.9 | 14.4,15.5 | 333                  | 14.0 | 12.7,15.5 | 258             | 12.5 | 11.2,14.0 |
| Three generation and skipped generation    | 1 400                                   | 9.2  | 8.7,9.6   | 242                  | 10.2 | 9.0,11.5  | 211             | 10.3 | 9.1,11.7  |
| <b>Property classification</b>             |                                         |      |           |                      |      |           |                 |      |           |
| Flat                                       | 7 887                                   | 51.6 | 50.8,52.4 | 1 253                | 52.8 | 50.8,54.8 | 1 120           | 54.5 | 52.3,56.6 |
| Terraced house                             | 6 375                                   | 41.7 | 41.0,42.5 | 970                  | 40.9 | 38.9,42.9 | 809             | 39.4 | 37.3,41.5 |
| Other                                      | 1 013                                   | 6.6  | 6.2,7.0   | 149                  | 6.3  | 5.4,7.3   | 126             | 6.1  | 5.2,7.3   |

<sup>1</sup> National Child Measurement Programme (NCMP)-recorded body mass index (BMI) after application of ethnic-specific BMI adjustments, categorised according to UK1990 clinical reference standard: "underweight or healthy weight" (<91st centile), "overweight" (≥91st to <98th centile), or "obese" (≥98th centile). <sup>2</sup> Confidence interval.

Table S4 – Characteristics of index and oldest child pairs, by index child's weight status<sup>1</sup>

|                                                 | Underweight & Healthy weight<br>(n=15 275) |           |                     | Overweight (n=2 372) |           |                     | Obese (n=2 055) |           |                     |
|-------------------------------------------------|--------------------------------------------|-----------|---------------------|----------------------|-----------|---------------------|-----------------|-----------|---------------------|
|                                                 | n                                          | %         | 95% CI <sup>2</sup> | n                    | %         | 95% CI <sup>2</sup> | n               | %         | 95% CI <sup>2</sup> |
| <b>Oldest child's weight status<sup>1</sup></b> |                                            |           |                     |                      |           |                     |                 |           |                     |
| Underweight                                     | 256                                        | 1.7       | 1.5,1.9             | 13                   | 0.5       | 0.3,0.9             | 11              | 0.5       | 0.3,1.0             |
| Healthy weight                                  | 11 652                                     | 76.3      | 75.6,76.9           | 1 371                | 57.8      | 55.7,59.7           | 915             | 44.5      | 42.5,46.8           |
| Overweight                                      | 1 955                                      | 12.8      | 12.3,13.3           | 528                  | 22.3      | 20.8,24.1           | 447             | 21.8      | 19.9,23.5           |
| Obese                                           | 1 412                                      | 9.2       | 8.8,9.7             | 460                  | 19.4      | 17.8,21.0           | 682             | 33.2      | 31.2,35.2           |
| <b>Sex concordance<sup>3</sup></b>              |                                            |           |                     |                      |           |                     |                 |           |                     |
| Different                                       | 7 681                                      | 50.0      | 49.4,51.0           | 1 174                | 49.5      | 47.5,51.5           | 1 049           | 51.0      | 48.8,53.1           |
| Same                                            | 7 594                                      | 49.7      | 49.0,50.6           | 1 198                | 50.5      | 48.5,52.5           | 1 006           | 49.0      | 46.9,51.2           |
| <b>Time difference (months)<sup>4</sup></b>     |                                            |           |                     |                      |           |                     |                 |           |                     |
| Median (IQR <sup>5</sup> )                      | 23.3                                       | 12.6,33.1 |                     | 23.4                 | 12.6,33.0 |                     | 22.9            | 12.5,31.9 |                     |

<sup>1</sup> National Child Measurement Programme (NCMP)-recorded body mass index (BMI) after application of ethnic-specific BMI adjustments, categorised according to UK1990 clinical reference standard: "underweight" (BMI<2nd centile), "healthy weight" (≥2nd to <91st centile), "overweight" (≥91st to <98th centile), or "obese" (≥98th centile). <sup>2</sup> Confidence interval. <sup>3</sup> Whether the youngest and oldest child were of the same or different sex. <sup>4</sup> Time difference, calculated in months, between the oldest and youngest child's NCMP measurements. <sup>5</sup> Interquartile range.

Table S5 – Univariable and multivariable odds ratios estimating the likelihood of obesity<sup>1</sup> among index children living in households with two National Child Measurement Programme participants

|                                                 | All (n=19 702)  |                     |                            |                     | Reception (n=13 699) |                     |                            |                     | Year 6 (n=6 003) |                     |                 |                     |
|-------------------------------------------------|-----------------|---------------------|----------------------------|---------------------|----------------------|---------------------|----------------------------|---------------------|------------------|---------------------|-----------------|---------------------|
|                                                 | Univariable     |                     | Multivariable <sup>2</sup> |                     | Univariable          |                     | Multivariable <sup>3</sup> |                     | Univariable      |                     | Multivariable   |                     |
|                                                 | OR <sup>5</sup> | 95% CI <sup>6</sup> | OR <sup>5</sup>            | 95% CI <sup>6</sup> | OR <sup>5</sup>      | 95% CI <sup>6</sup> | OR <sup>5</sup>            | 95% CI <sup>6</sup> | OR <sup>5</sup>  | 95% CI <sup>6</sup> | OR <sup>5</sup> | 95% CI <sup>6</sup> |
| <b>Oldest child's weight status<sup>7</sup></b> |                 |                     |                            |                     |                      |                     |                            |                     |                  |                     |                 |                     |
| Underweight & Healthy weight (reference)        | 1               |                     | 1                          |                     | 1                    |                     | 1                          |                     | 1                |                     | 1               |                     |
| Overweight                                      | 2.58            | 2.29,2.92           | 2.33                       | 2.06,2.64           | 2.46                 | 2.09,2.90           | 2.20                       | 1.87,2.60           | 2.57             | 2.14,3.08           | 2.46            | 2.05,2.96           |
| Obese                                           | 5.23            | 4.68,5.84           | 4.59                       | 4.10,5.14           | 5.00                 | 4.31,5.80           | 4.41                       | 3.79,5.13           | 5.05             | 4.27,5.97           | 4.82            | 4.07,5.71           |
| <b>Number of children in the household</b>      |                 |                     |                            |                     |                      |                     |                            |                     |                  |                     |                 |                     |
| 2 (reference)                                   | 1               |                     | 1                          |                     | 1                    |                     | 1                          |                     | 1                |                     | 1               |                     |
| 3                                               | 0.98            | 0.87,1.09           | 0.87                       | 0.77,0.98           | 1.00                 | 0.86,1.17           | 0.83                       | 0.70,0.97           | 1.03             | 0.87,1.21           |                 |                     |
| 4 or more                                       | 1.05            | 0.94,1.18           | 0.96                       | 0.84,1.08           | 1.13                 | 0.97,1.32           | 0.91                       | 0.78,1.08           | 1.14             | 0.96,1.35           |                 |                     |
| <b>Household composition</b>                    |                 |                     |                            |                     |                      |                     |                            |                     |                  |                     |                 |                     |
| Adults with children (reference)                | 1               |                     |                            |                     | 1                    |                     |                            |                     | 1                |                     |                 |                     |
| Single adult with children                      | 0.83            | 0.73,0.96           |                            |                     | 0.75                 | 0.61,0.91           |                            |                     | 0.91             | 0.74,1.40           |                 |                     |
| Three and skipped generation                    | 1.08            | 0.93,1.26           |                            |                     | 1.04                 | 0.85,1.29           |                            |                     | 1.12             | 0.89,1.40           |                 |                     |
| <b>Sex</b>                                      |                 |                     |                            |                     |                      |                     |                            |                     |                  |                     |                 |                     |
| Male (reference)                                | 1               |                     | 1                          |                     | 1                    |                     | 1                          |                     | 1                |                     | 1               |                     |
| Female                                          | 0.74            | 0.68,0.81           | 0.73                       | 0.67,0.81           | 0.81                 | 0.71,0.92           | 0.80                       | 0.71,0.91           | 0.66             | 0.58,0.76           | 0.65            | 0.56,0.75           |
| <b>Ethnic background<sup>8</sup></b>            |                 |                     |                            |                     |                      |                     |                            |                     |                  |                     |                 |                     |
| White (reference)                               | 1               |                     | 1                          |                     | 1                    |                     | 1                          |                     | 1                |                     | 1               |                     |
| Mixed and Other                                 | 1.25            | 1.07,1.45           | 1.17                       | 1.00,1.37           | 1.13                 | 0.91,1.40           | 1.10                       | 0.88,1.36           | 1.36             | 1.08,1.70           | 1.25            | 0.99,1.57           |
| South Asian                                     | 2.20            | 1.94,2.49           | 1.89                       | 1.64,2.19           | 2.40                 | 2.02,2.84           | 2.09                       | 1.75,2.50           | 2.02             | 1.67,2.46           | 1.67            | 1.37,2.04           |
| Black                                           | 0.84            | 0.71,0.98           | 0.78                       | 0.66,0.93           | 0.61                 | 0.48,0.78           | 0.63                       | 0.49,0.81           | 1.04             | 0.83,1.31           | 0.96            | 0.76,1.21           |
| <b>School year<sup>9</sup></b>                  |                 |                     |                            |                     |                      |                     |                            |                     |                  |                     |                 |                     |
| Reception (reference)                           | 1               |                     | 1                          |                     |                      |                     |                            |                     |                  |                     |                 |                     |
| Year 6                                          | 2.26            | 2.06,2.48           | 2.21                       | 2.00,2.43           |                      |                     |                            |                     |                  |                     |                 |                     |



|                                              | All (n=19 702)  |                     |                            |                     | Reception (n=13 699) |                     |                            |                     | Year 6 (n=6 003) |                     |                 |                     |
|----------------------------------------------|-----------------|---------------------|----------------------------|---------------------|----------------------|---------------------|----------------------------|---------------------|------------------|---------------------|-----------------|---------------------|
|                                              | Univariable     |                     | Multivariable <sup>2</sup> |                     | Univariable          |                     | Multivariable <sup>3</sup> |                     | Univariable      |                     | Multivariable   |                     |
|                                              | OR <sup>5</sup> | 95% CI <sup>6</sup> | OR <sup>5</sup>            | 95% CI <sup>6</sup> | OR <sup>5</sup>      | 95% CI <sup>6</sup> | OR <sup>5</sup>            | 95% CI <sup>6</sup> | OR <sup>5</sup>  | 95% CI <sup>6</sup> | OR <sup>5</sup> | 95% CI <sup>6</sup> |
| <b>Academic year<sup>10</sup></b>            |                 |                     |                            |                     |                      |                     |                            |                     |                  |                     |                 |                     |
| 2013/14                                      | 0.70            | 0.32,1.52           |                            |                     | 0.86                 | 0.37,1.99           |                            |                     |                  |                     |                 |                     |
| 2014/15                                      | 0.83            | 0.60,1.16           |                            |                     | 1.01                 | 0.69,1.49           |                            |                     | 1.17             | 0.58,2.34           |                 |                     |
| 2015/16                                      | 0.94            | 0.80,1.11           |                            |                     | 1.16                 | 0.95,1.43           |                            |                     | 0.93             | 0.70,1.24           |                 |                     |
| 2016/17                                      | 0.91            | 0.80,1.03           |                            |                     | 1.01                 | 0.85,1.21           |                            |                     | 0.94             | 0.78,1.15           |                 |                     |
| 2017/18                                      | 0.90            | 0.81,1.01           |                            |                     | 0.93                 | 0.79,1.08           |                            |                     | 0.94             | 0.80,1.11           |                 |                     |
| 2018/19 (reference)                          | 1               |                     |                            |                     | 1                    |                     |                            |                     | 1                |                     |                 |                     |
| <b>Local authority<sup>11</sup></b>          |                 |                     |                            |                     |                      |                     |                            |                     |                  |                     |                 |                     |
| City & Hackney                               | 0.74            | 0.66,0.84           | 1.00                       | 0.87,1.14           | 0.67                 | 0.57,0.80           |                            |                     | 0.84             | 0.70,1.01           |                 |                     |
| Newham (reference.)                          | 1               |                     | 1                          |                     | 1                    |                     |                            |                     | 1                |                     |                 |                     |
| Tower Hamlets                                | 1.15            | 1.02,1.30           | 0.96                       | 0.84,1.10           | 1.25                 | 1.06,1.47           |                            |                     | 1.13             | 0.92,1.38           |                 |                     |
| Waltham Forest                               | 0.74            | 0.65,0.84           | 0.87                       | 0.76,0.99           | 0.69                 | 0.58,0.83           |                            |                     | 0.76             | 0.63,0.92           |                 |                     |
| <b>Sex concordance<sup>12</sup></b>          |                 |                     |                            |                     |                      |                     |                            |                     |                  |                     |                 |                     |
| Different (reference.)                       | 1               |                     |                            |                     | 1                    |                     |                            |                     | 1                |                     |                 |                     |
| Same                                         | 0.97            | 0.88,1.06           |                            |                     | 0.96                 | 0.85,1.08           |                            |                     | 1.00             | 0.87,1.14           |                 |                     |
| <b>Time difference (months)<sup>13</sup></b> |                 |                     |                            |                     |                      |                     |                            |                     |                  |                     |                 |                     |
|                                              | 1.00            | 0.99,1.00           |                            |                     | 0.99                 | 0.99,1.00           |                            |                     | 1.00             | 0.99,1.00           |                 |                     |

<sup>1</sup> National Child Measurement Programme (NCMP)-recorded body mass index (BMI) after application of ethnic-specific BMI adjustments, categorised according to UK1990 clinical reference standard: "obese" ( $\geq 98$ th centile). <sup>2</sup> Mutually adjusting for oldest child's weight status, number of children in the household, sex, ethnic background and school year. <sup>3</sup> Mutually adjusting for the oldest child's weight status, number of children in the household, sex and ethnic background. <sup>4</sup> Mutually adjusting for the oldest child's weight status, sex and ethnic background. <sup>5</sup> Odds ratio. <sup>6</sup> Confidence interval. <sup>7</sup> National Child Measurement Programme (NCMP)-recorded body mass index (BMI) after application of ethnic-specific BMI adjustments, categorised according to UK1990 clinical reference standard: "underweight or healthy weight" ( $< 91$ st centile), "overweight" ( $\geq 91$ st to  $< 98$ th centile), or "obese" ( $\geq 98$ th centile). <sup>8</sup> As recorded in the NCMP and, where missing, supplemented with ethnic background as recorded in the child's primary care electronic health record. <sup>9</sup> School year of participation in the National Child Measurement Programme (NCMP), Reception participants are aged 4-5 years and Year 6 participants are aged 10-11 years. <sup>10</sup> Academic year of participation in the National Child Measurement Programme (NCMP). Academic years run from September to July. <sup>11</sup> Local authority of school where child participated in the NCMP. <sup>12</sup> Whether the youngest and oldest child were of the same or different sex. <sup>13</sup> Time difference, calculated in months, between the oldest and youngest child's NCMP measurements. Cells highlighted in bold indicate occasions where the estimates are significantly different to the reference group in the multivariable models.
